# Supplementary material for: Genome sequence of the non-conventional wine yeast Hanseniaspora guilliermondii UTAD222 unveils relevant traits of this species and of the Hanseniaspora genus in the context of wine fermentation
Source: PubMed Central journal article supplement — DNA Res. 2018 Nov 20;26(1):67–83. doi: 10.1093/dnares/dsy039 (PMC6379042; doi:10.1093/dnares/dsy039), 2018-11-20
Supplement: dsy039_supplementary_table_s4.pdf [file dsy039_supplementary_table_s4.pdf]

Sup Table S4 - Results from the comparative analysis of the predicted proteome of *H. guilliermondii*, *H. uvarum* and *H. opuntiae*. In this table it is provided the complete list of *H. guilliermondii* proteins having an orthologue in *H. Uvarum* but not in *opuntiae* or vice-versa. The list of proteins only found to be present in *H. guilliermondii* is provided in Table 3

***H. guilliermondii* UTAD222 proteins having an orthologue in *H. uvarum* but not in *H. opuntiae***

| ORF name   | Probable Function                                                                | <i>H. uvarum</i> orthologue (in AWRI3580/in DSM2768) |
|------------|----------------------------------------------------------------------------------|------------------------------------------------------|
| HGUI_03766 | 40S ribosomal protein S9-B                                                       | AWRI3580_g1278/-                                     |
| HGUI_03940 | ATP synthase F0 subunit 6                                                        | *                                                    |
| HGUI_03532 | Predicted to be involved in endosome-to-Golgi intracellular trafficking          | -/HuPEP8                                             |
| HGUI_00706 | Dolichyl pyrophosphate Man9GlcNAc2 alpha-1,3-glucosyltransferase                 | AWRI3580_g2240/HuALG6                                |
| HGUI_03286 | Dolichyl-diphosphooligosaccharide--protein glycosyltransferase                   | AWRI3580_g1764/HuOST2                                |
| HGUI_03882 | Dol-P-Glc:Glc(2)Man(9)GlcNAc(2)-PP-Dol alpha-1,2-glucosyltransferase             | AWRI3580_g1578/-                                     |
| HGUI_01192 | Eukaryotic translation initiation factor eIF-1                                   | AWRI3580_g477/-                                      |
| HGUI_00394 | Predicted hydroxyacyl-thioester dehydratase involved in fatty acid biosynthesis  | AWRI3580_g894/HuHTD2                                 |
| HGUI_02418 | hypothetical protein                                                             | AWRI3580_g1155/-                                     |
| HGUI_02236 | hypothetical protein                                                             | AWRI3580_g1206/D499_0A01470                          |
| HGUI_02674 | hypothetical protein                                                             | AWRI3580_g195/-                                      |
| HGUI_01572 | hypothetical protein                                                             | AWRI3580_g2315/D499_0V00460                          |
| HGUI_01919 | hypothetical protein                                                             | AWRI3580_g3156/-                                     |
| HGUI_01507 | hypothetical protein                                                             | AWRI3580_g3494/-                                     |
| HGUI_03033 | hypothetical protein                                                             | AWRI3580_g680/-                                      |
| HGUI_01967 | hypothetical protein                                                             | AWRI3580_g1057/D499_0B02930                          |
| HGUI_03880 | hypothetical protein                                                             | AWRI3580_g769/D499_0D00190                           |
| HGUI_03533 | hypothetical protein                                                             | AWRI3580_g2712/D499_0O00610                          |
| HGUI_00957 | hypothetical protein                                                             | AWRI3580_g3205/D499_0S00140                          |
| HGUI_01400 | Predicted to be involved in meiotic recombination                                | AWRI3580_g1315/-                                     |
| HGUI_03082 | Predicted oxidoreductase of unknown function                                     | AWRI3580_g988/HuMHO1                                 |
| HGUI_03531 | Predicted mitochondrial import inner membrane translocase subunit                | AWRI3580_g2710/HuTIM54                               |
| HGUI_02284 | Predicted to be involved in intracellular protein trafficking, similar to ScSss1 | AWRI3580_g3696/-                                     |
| HGUI_02921 | Ribosomal protein S27B                                                           | AWRI3580_g1002/-                                     |
| HGUI_02055 | U6 snRNA-associated Sm-like protein LSM6                                         | AWRI3580_g1519/-                                     |
| HGUI_03514 | Predicted UDP-N-acetylglucosamine transferase                                    | AWRI3580_g742/HuALG14                                |

\*although not found in AWRI3580 or DSM2768 strains, this protein presents similarity with the *H. uvarum* MUCL 31704 protein encoding gene *atp6*

***H. guilliermondii* UTAD222 proteins having an orthologue in *H. opuntiae* but not in *H. uvarum***

| ORF name   | Probable Function                                                    | <i>H. opuntiae</i> 3578 orthologue |
|------------|----------------------------------------------------------------------|------------------------------------|
| HGUI_02309 | Predicted chitin synthase export chaperone                           | AWRI3578_g694                      |
| HGUI_03602 | Predicted vacuolar membrane Cu transporter                           | AWRI3578_g678                      |
| HGUI_02076 | Cytochrome c oxidase assembly protein Cox19                          | AWRI3578_g1039                     |
| HGUI_02829 | DNA-directed RNA polymerases I, II, and III subunit RPABC5           | AWRI3578_g778                      |
| HGUI_01733 | Dolichyl pyrophosphate Glc1Man9GlcNAc2 alpha-1,3-glucosyltransferase | AWRI3578_g4036                     |
| HGUI_00687 | Predicted to be involved in ER-derived vesicles, similar to ScErv14  | AWRI3578_g1629                     |
| HGUI_01945 | FIT family protein YFT2                                              | AWRI3578_g2756                     |
| HGUI_02281 | Predicted Golgi apparatus membrane protein, similar to ScTvp23       | AWRI3578_g2662                     |
| HGUI_01849 | Predicted to be involved in meiosis, similar to ScSpo11              | AWRI3578_g1481                     |

|            |                                                                                                  |                |
|------------|--------------------------------------------------------------------------------------------------|----------------|
| HGUI_02598 | Mitochondrial import inner membrane translocase subunit TIM12                                    | AWRI3578_g3410 |
| HGUI_03213 | Mitochondrial inner membrane protease subunit 2                                                  | AWRI3578_g347  |
| HGUI_01086 | Mitochondrial protein required for assembly of cytochrome c oxidase, mitochondrial               | AWRI3578_g916  |
| HGUI_02427 | Predicted to be involved in protein palmitoylation, similar to ScSwf1                            | AWRI3578_g3718 |
| HGUI_00194 | Predicted transcriptional regulator of the Zn-finger family, shows some similarity with ScRim101 | AWRI3578_g3297 |
| HGUI_02570 | Pre-mRNA-splicing factor, similar to ScBUD31                                                     | AWRI3578_g3471 |
| HGUI_00920 | Pre-mRNA-splicing factor, similar to ScCWC24                                                     | AWRI3578_g3969 |
| HGUI_00264 | Mitochondrial protein predicted to be involved in ethanol metabolism, similar to ScSym1          | AWRI3578_g1271 |
| HGUI_02287 | putative 5-hydroxyisourate hydrolase                                                             | AWRI3578_g2657 |
| HGUI_00707 | putative glucan endo-1,3-beta-glucosidase btgC                                                   | AWRI3578_g1650 |
| HGUI_01349 | Predicted GPI-anchored protein of unknown function                                               | AWRI3578_g2558 |
| HGUI_04010 | ribosomal protein S30                                                                            | AWRI3578_g1898 |
| HGUI_01297 | Predicted to be involved in sporulation, similar to ScSpo7                                       | AWRI3578_g1932 |
| HGUI_01594 | Structure-specific endonuclease subunit SLX1                                                     | AWRI3578_g1590 |
| HGUI_02312 | Predicted membrane protein of unknown function                                                   | AWRI3578_g691  |
| HGUI_02743 | Predicted membrane protein of unknown function                                                   | AWRI3578_g3447 |
| HGUI_03176 | Predicted to be involved in vacuolar ATPase assembly integral membrane protein VPH2              | AWRI3578_g316  |
| HGUI_03779 | Uncharacterized protein                                                                          | AWRI3578_g1012 |
| HGUI_01084 | Uncharacterized protein                                                                          | AWRI3578_g914  |
| HGUI_02099 | hypothetical protein                                                                             | AWRI3578_g1062 |
| HGUI_03580 | hypothetical protein                                                                             | AWRI3578_g107  |
| HGUI_01791 | hypothetical protein                                                                             | AWRI3578_g125  |
| HGUI_01745 | hypothetical protein                                                                             | AWRI3578_g1260 |
| HGUI_03984 | hypothetical protein                                                                             | AWRI3578_g1414 |
| HGUI_02153 | hypothetical protein                                                                             | AWRI3578_g1466 |
| HGUI_01852 | hypothetical protein                                                                             | AWRI3578_g1484 |
| HGUI_01860 | hypothetical protein                                                                             | AWRI3578_g1493 |
| HGUI_01879 | hypothetical protein                                                                             | AWRI3578_g1512 |
| HGUI_01556 | hypothetical protein                                                                             | AWRI3578_g1553 |
| HGUI_03701 | hypothetical protein                                                                             | AWRI3578_g1615 |
| HGUI_00563 | hypothetical protein                                                                             | AWRI3578_g1655 |
| HGUI_00712 | hypothetical protein                                                                             | AWRI3578_g1655 |
| HGUI_02623 | hypothetical protein                                                                             | AWRI3578_g1756 |
| HGUI_03641 | hypothetical protein                                                                             | AWRI3578_g1767 |
| HGUI_02459 | hypothetical protein                                                                             | AWRI3578_g2007 |
| HGUI_00652 | hypothetical protein                                                                             | AWRI3578_g2102 |
| HGUI_03409 | hypothetical protein                                                                             | AWRI3578_g2117 |
| HGUI_03324 | hypothetical protein                                                                             | AWRI3578_g2205 |
| HGUI_02363 | hypothetical protein                                                                             | AWRI3578_g2240 |
| HGUI_02556 | hypothetical protein                                                                             | AWRI3578_g2277 |
| HGUI_01194 | hypothetical protein                                                                             | AWRI3578_g231  |
| HGUI_03866 | hypothetical protein                                                                             | AWRI3578_g2330 |
| HGUI_00512 | hypothetical protein                                                                             | AWRI3578_g2451 |
| HGUI_00507 | hypothetical protein                                                                             | AWRI3578_g2456 |
| HGUI_03629 | hypothetical protein                                                                             | AWRI3578_g2493 |
| HGUI_01326 | hypothetical protein                                                                             | AWRI3578_g2581 |
| HGUI_00327 | hypothetical protein                                                                             | AWRI3578_g2634 |
| HGUI_03558 | hypothetical protein                                                                             | AWRI3578_g2717 |

HGUI\_03551 hypothetical protein  
HGUI\_03550 hypothetical protein  
HGUI\_01957 hypothetical protein  
HGUI\_01664 hypothetical protein  
HGUI\_01687 hypothetical protein  
HGUI\_03684 hypothetical protein  
HGUI\_03921 hypothetical protein  
HGUI\_02520 hypothetical protein  
HGUI\_00191 hypothetical protein  
HGUI\_04004 hypothetical protein  
HGUI\_02493 hypothetical protein  
HGUI\_02419 hypothetical protein  
HGUI\_02412 hypothetical protein  
HGUI\_02238 hypothetical protein  
HGUI\_01428 hypothetical protein  
HGUI\_00891 hypothetical protein  
HGUI\_01725 hypothetical protein  
HGUI\_03574 hypothetical protein  
HGUI\_00952 hypothetical protein  
HGUI\_04052 hypothetical protein  
HGUI\_03983 hypothetical protein  
HGUI\_00026 hypothetical protein  
HGUI\_02004 hypothetical protein  
HGUI\_02012 hypothetical protein  
HGUI\_02115 hypothetical protein  
HGUI\_00754 hypothetical protein  
HGUI\_02835 hypothetical protein  
HGUI\_01043 hypothetical protein  
HGUI\_00872 hypothetical protein

AWRI3578\_g2723  
AWRI3578\_g2724  
AWRI3578\_g2744  
AWRI3578\_g2934  
AWRI3578\_g2958  
AWRI3578\_g3095  
AWRI3578\_g3146  
AWRI3578\_g3165  
AWRI3578\_g3300  
AWRI3578\_g3425  
AWRI3578\_g3556  
AWRI3578\_g3726  
AWRI3578\_g3732  
AWRI3578\_g3776  
AWRI3578\_g3912  
AWRI3578\_g3938  
AWRI3578\_g4044  
AWRI3578\_g4154  
AWRI3578\_g4168  
AWRI3578\_g4170  
AWRI3578\_g4175  
AWRI3578\_g442  
AWRI3578\_g496  
AWRI3578\_g504  
AWRI3578\_g591  
AWRI3578\_g623  
AWRI3578\_g784  
AWRI3578\_g875  
AWRI3578\_g933
